# Supplementary material for: Childbirth History Increases Arthritis Risk in Women: The Role of Lipid Metabolism and Physical Activity
Source: Research Square preprint supplement (doi:10.21203/rs.3.rs-6597672/v1), 2025-05-14

**Supplement Figure 1. Restricted cubic splines curves of blood lipid indexes.**


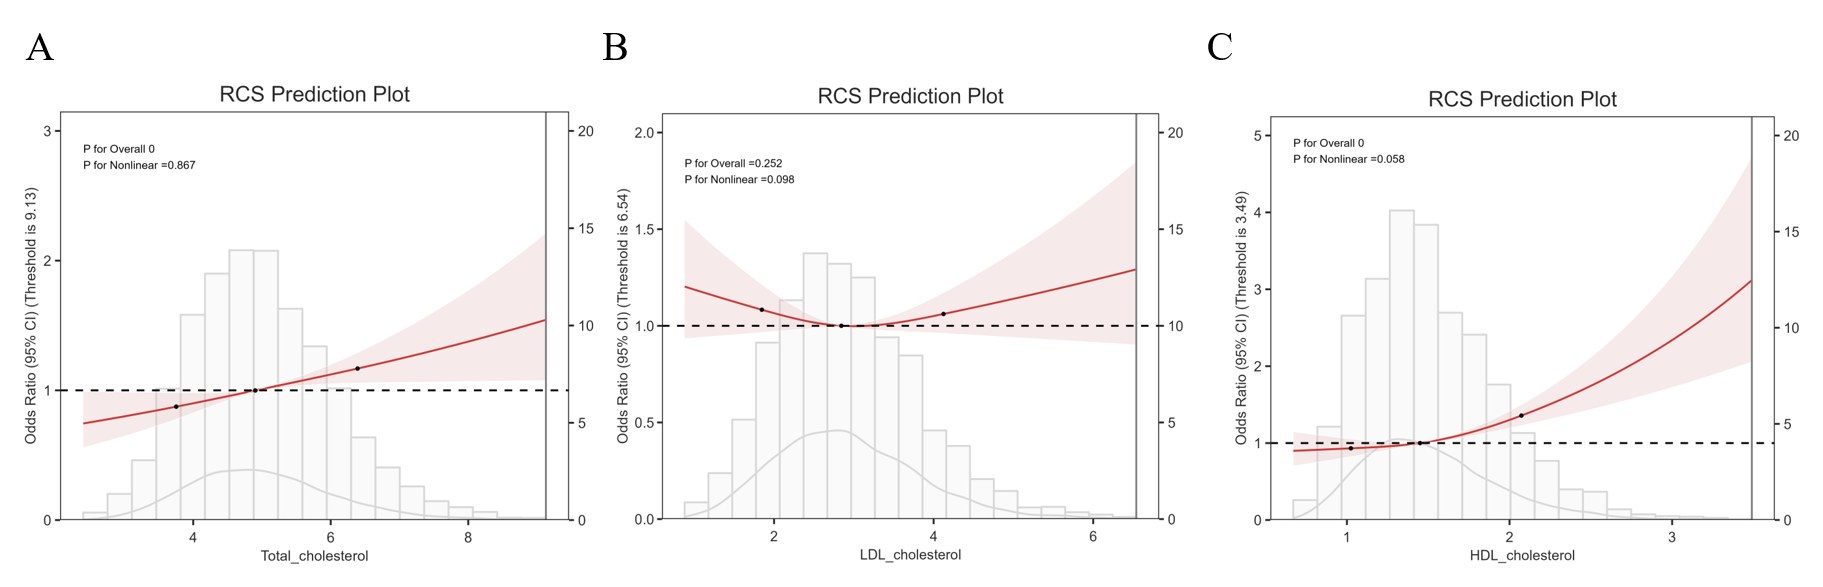


A. Restricted cubic splines curves of total cholesterol

B. Restricted cubic splines curves of LDL-cholesterol

C. Restricted cubic splines curves of HDL-cholesterol

**Supplement Figure 2. Logistic Regression Forest Plot of physical activity**


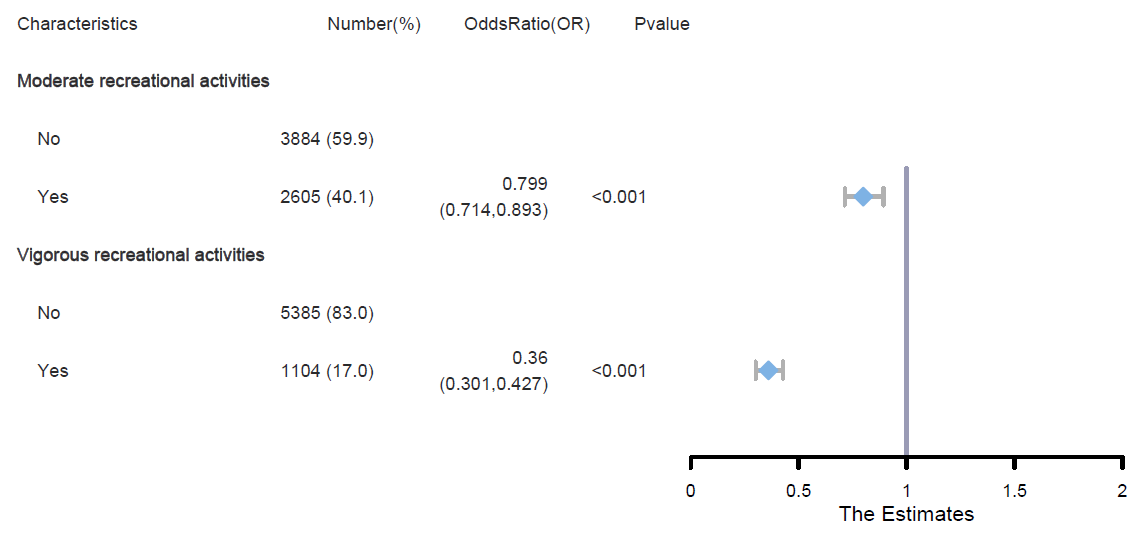


**Supplement Figure 3. Restricted cubic splines curves of moderate recreational activities.**


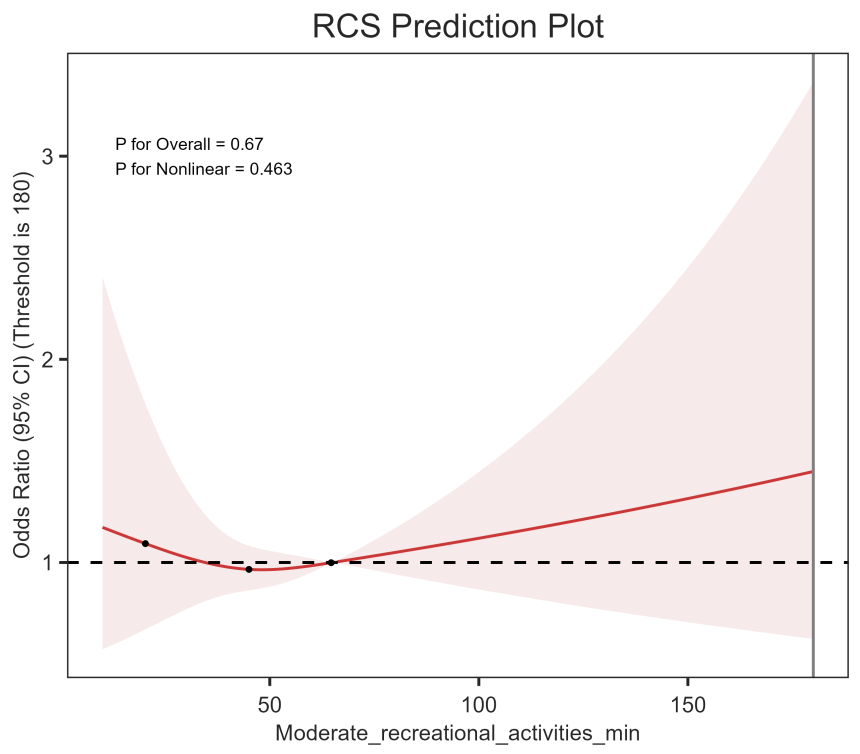

Supplement: Supplementary file 1 [file 89a37f75be12490822488540.docx]
